# Supplementary material for: Monitoring of efficacy, tolerability and safety of artemether–lumefantrine and artesunate–amodiaquine for the treatment of uncomplicated Plasmodium falciparum malaria in Lambaréné, Gabon: an open-label clinical trial
Source: PubMed Central journal article supplement (PMC6916217; doi:10.1186/s12936-019-3015-4), 2019-12-16
Supplement: 12936_2019_3015_MOESM1_ESM.pdf [file 12936_2019_3015_MOESM1_ESM.pdf]

## Additional file

**Table S1: Pfm<sub>sp1</sub> genotyping by capillary electrophoresis**

| Day    | VID     | K1  | RO33 | MAD20 | Interpretation |
|--------|---------|-----|------|-------|----------------|
| Day 0  | TET 011 | 242 | 0    | 0     | recrudescence  |
| Day 28 | TET 011 | 242 | 0    | 194   | recrudescence  |
| Day 0  | TET 012 | 187 | 0    | 0     | new infection  |
| Day 21 | TET 012 | 224 | 0    | 0     | new infection  |
| Day 0  | TET 013 | 187 | 0    | 203   | new infection  |
| Day 28 | TET 013 | 224 | 0    | 0     | new infection  |
| Day 0  | TET 014 | 242 | 0    | 0     | new infection  |
| Day 28 | TET 014 | 0   | 154  | 0     | new infection  |
| Day 0  | TET 020 | 242 | 154  | 212   | recrudescence  |
| Day 28 | TET 020 | 242 | 0    | 0     | recrudescence  |
| Day 0  | TET 025 | 0   | 0    | 212   | new infection  |
| Day 28 | TET 025 | 168 | 0    | 0     | new infection  |
| Day 0  | TET 028 | 224 | 0    | 0     | ND             |
| Day 21 | TET 028 | 0   | 0    | 0     | ND             |
| Day 0  | TET 033 | 242 | 0    | 0     | recrudescence  |
| Day 14 | TET 033 | 242 | 0    | 0     | recrudescence  |
| Day 0  | TET 039 | 0   | 154  | 0     | new infection  |
| Day 21 | TET 039 | 0   | 0    | 194   | new infection  |
| Day 0  | TET 050 | 204 | 0    | 0     | new infection  |
| Day 28 | TET 050 | 224 | 0    | 0     | new infection  |
| Day 0  | TET 051 | 0   | 154  | 194   | recrudescence  |
| Day 28 | TET 051 | 0   | 154  | 175   | recrudescence  |
| Day 0  | TET 054 | 204 | 154  | 0     | new infection  |
| Day 21 | TET 054 | 153 | 0    | 0     | new infection  |
| Day 0  | TET 064 | 242 | 154  | 0     | recrudescence  |
| Day 14 | TET 064 | 242 | 154  | 194   | recrudescence  |
| Day 0  | TET 074 | 194 | 154  | 0     | new infection  |
| Day 28 | TET 074 | 212 | 0    | 0     | new infection  |
| Day 0  | TET 094 | 0   | 154  | 194   | new infection  |
| Day 28 | TET 094 | 224 | 0    | 0     | new infection  |

**Table S2: PfmSP2 genotyping by capillary electrophoresis**

| Day    | VID     | IC_3D7.allele1 | IC_3D7.allele2 | IC_3D7.allele3 | IC_3D7.allele4 | FC27.allele1 | Interpretation |
|--------|---------|----------------|----------------|----------------|----------------|--------------|----------------|
| Day 0  | TET 011 | NA             | NA             | NA             | NA             | NA           | NA             |
| Day 28 | TET 011 | NA             | NA             | NA             | NA             | NA           | NA             |
| Day 0  | TET 020 | 247            | 326            | 344            | 384            | 478          | new infection  |
| Day 28 | TET 020 | 283            | NA             | NA             | NA             | 0            | new infection  |
| Day 0  | TET 033 | 643            | NA             | NA             | NA             | 446          | recrudescence  |
| Day 14 | TET 033 | NA             | NA             | NA             | NA             | 446          | recrudescence  |
| Day 0  | TET 051 | 643            | NA             | NA             | NA             | 446          | recrudescence  |
| Day 28 | TET 051 | 346            | NA             | NA             | NA             | 446          | recrudescence  |
| Day 0  | TET 064 | 279            | NA             | NA             | NA             | 405          | recrudescence  |
| Day 14 | TET 064 | 279            | NA             | NA             | NA             | 406          | recrudescence  |
